# Supplementary material
Source: PubMed Central journal article supplement (PMC3398559)
Supplement: supp_tpc.112.096610_tpc096610Supplemental.pdf [file supp_tpc.112.096610_tpc096610Supplemental.pdf]

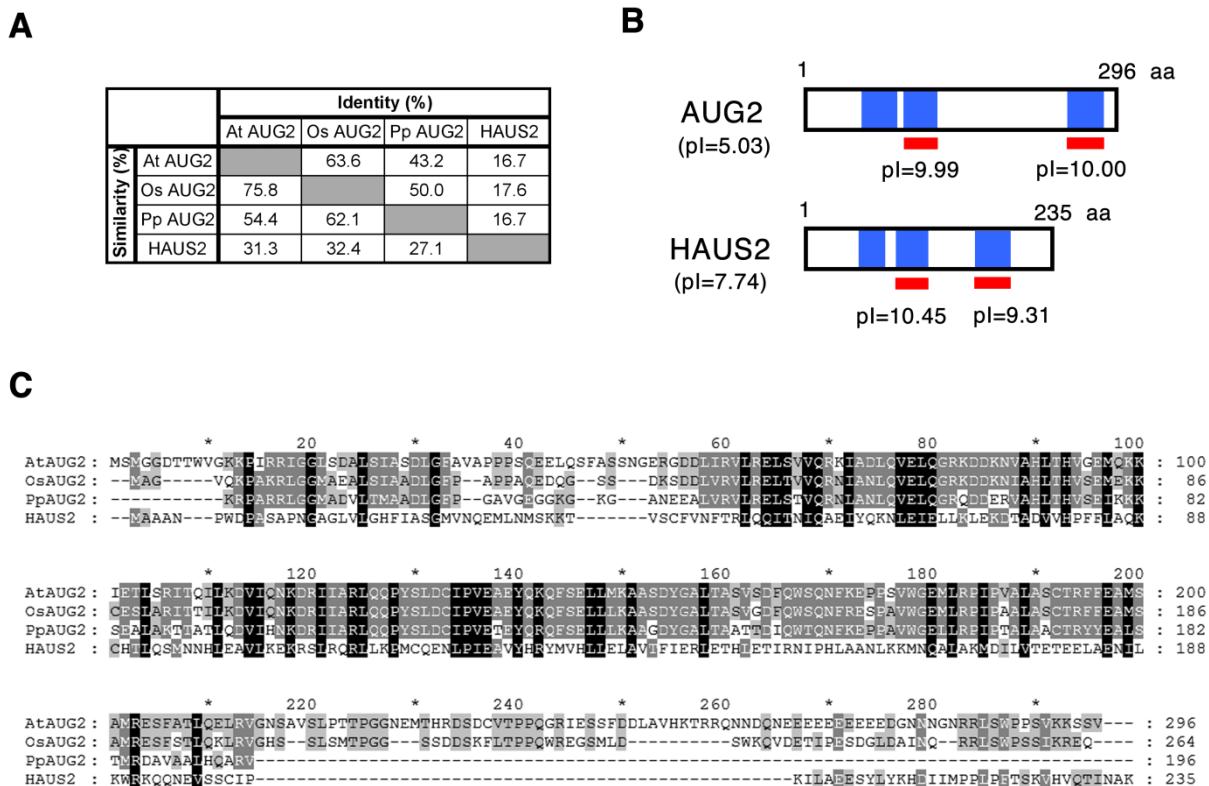

**Supplemental Figure 1. Amino acid sequence comparison of plant AUG2 homologs and human HAUS2. The GenBank accession numbers are NP\_565760 (At2g32980, At AUG2), NP\_001061229 (Os08g0204800, Os AUG2), XP\_001754674 (Pp AUG2), and NP\_060567 (HAUS2).**

(A) Sequence identity and similarity among At AUG2, Os AUG2, Pp AUG2 and HAUS2. Plant AUG2 homologs are compared to the human HAUS2 protein. The plant species are *A. thaliana* (At), the rice *Oryza sativa* (Os), the moss *Physcomitrella patens* (Pp).

(B) Schematic diagram of At AUG2 and HAUS2. Coiled-coil motifs are indicated in blue. Basic regions were indicated with red bars and theoretical pI values.

(C) Multiple sequence alignment of plant AUG2 homologs and human HAUS2. Conserved (identical and similar) residues among all proteins are boxed in black and those partially conserved in gray.

**A**

|                |         | Identity (%) |         |         |       |
|----------------|---------|--------------|---------|---------|-------|
|                |         | At AUG4      | Os AUG4 | Pp AUG4 | HAUS4 |
| Similarity (%) | At AUG4 |              | 61.0    | 56.2    | 19.0  |
|                | Os AUG4 | 72.6         |         | 56.0    | 19.3  |
|                | Pp AUG4 | 73.5         | 70.1    |         | 20.4  |
|                | HAUS4   | 36.5         | 34.3    | 36.1    |       |

**B**

```

AtAUG4 : MYKALQGFAQNLPAADVNGLLDQLERHCLAPFGSLVTRKSVYSDFQIAREEMSERIRYLEAMAIYCEAVANVEEYQCALS--VANHGGLRDVCGLYPQL : 96
OsAUG4 : NSKFAAA--SLPPPPEVAHLVDQLQRHHLAPPASLLSSCAHSDLLQAREEVASERARYLEALAVYEAATANVEEYQFAISTGVANAG-----K : 88
PpAUG4 : MVKMLLPDPATALGQQCSALLDQLERHCLAPASLVSKDANLDLLQAREEMARERARYLEALAVYCEAVAVVEEYQFALS--IANVGGIRDLLNTVFDQL : 98
HAUS4 : NASGDFCSPGEG--MEILCCWCSKQLPFCNLSKEDLLQNEYESKLLLNLSLHVLESGLSLTLAKEQIQWKEVRLHKTTLWR----- : 80

AtAUG4 : GLKNSQVMELELHRLVVAEPAACKLRLLPLSDGSEIHBEETKWSILSRSSLDSEASTFLLSSTNSVNYANSANSVAG-----GISLSAVDTEVGG : 190
OsAUG4 : KUNCSEQVMELELHRLVVAEPAACKLRLLPLSDGSDVHBEETKLSLRSSEFDSMTSAAPSSSISTSYNNYSTASAATVAAAPCTGGSEFVPEPGVGG : 188
PpAUG4 : GIRSSEQVMDALEQRLVVAETQRLRLPLASKQCDLHEDDNEEWGNVSRSEDSSTTSLSLSTIISVHTTASATASIAS----GGKEPEFVPEPGVGG : 194
HAUS4 : ---S--EILHRVIGQLVVDYYVKIQDTNVVSEKKEEPLERLLVTELMRLLGFSQERE--PP----- : 138

AtAUG4 : VVNRFLGITPAVLSYVQLQN-TISMDADYCMFLAREIEGRLEKCKDADDAIVD--T-DSSVGNRNSCARLPERVFFIIEEIRDEFAATREDIYSAERK : 287
OsAUG4 : VEDRELGITSDVLYVQCQPPAMVDVYQRLAREIEARTEKCKTADADLAMD--ERSSSISQISSARLPERVKLIIEEIRKPEALILDILASMRK : 287
PpAUG4 : VVNRFLGITPAVLRCTHLIRVFPADNTQYCMFLIEIEBARLAKCKDRVSAETD--E-TGVADSAGPILRLPERVKIADIEBAEPAALIEHLIYAAERK : 292
HAUS4 : ----LGLERDLELMP----LSELFVWMRARIQCEVEECLKCKFTLLCYLDFNSDADESEVKAAKVVKIABVVLVGECCCGDAKSQQKQCMLLLRK : 230

AtAUG4 : FAEYYNVLEQILGVLLKLVKDKLEHCKVNEVCKVNIQRCETMNRKLRVLENVLLLETYTPDSTSALEHNTFNMLVEMTEPASAANKAVTFLREYQGV : 387
OsAUG4 : FAEYYNVLEQILGVLLKLVKDKLEHCKVNEVCKVNIQRCETMNRKLRVLENVLLLETYTPDSTSALEHNTFNMLVEMTEPASAANKAVTFLREYQGV : 387
PpAUG4 : FSEYYNVLEQILGVLLKLVKDKLEHCKVNEVCKVNIQRCETMNRKLRVLENVLLLETYTPDSTSALEHNTFNMLVEMTEPASAANKAVTFLREYQGV : 392
HAUS4 : SFAISQVLLRCLLLELRLQEHRLKTCSELRNNAVYEVKCGAMILKLRMEELKILSDTYTVERVEVHRIIDRLIECAIHLQEQDMENSQVLSNYEVL : 330

AtAUG4 : DPEFDLIRROYHLEIKKLENCQWTECVEMDLRSHD----- : 423
OsAUG4 : DPEFDLIRROYHLEIKKLENCQWTECVEMDLRPHDHADV : 428
PpAUG4 : DQDFDLEIRRYHLEIKKLENCQWTECVEMDLRSHD : 433
HAUS4 : GEPFDLIRVKEYTVLQKATENKRFPAIQEFSKVVYR----- : 363
    
```

**Supplemental Figure 2. Sequence comparison of plant AUG4 homologs and human HAUS4. The GenBank accession numbers are AEE32582 (At1g507110, At AUG4), EAZ21518 (OsJ\_05142, Os AUG4), XP\_001768748 (Pp AUG4), and NP\_060285 (HAUS4).**

(A) Sequence identity and similarity among At AUG4, Os AUG4, Pp AUG4 and human HAUS4.

(B) Multiple sequence alignment of plant AUG4 homologs and human HAUS4.

**A**

|                |         | Identity (%) |         |         |       |         |
|----------------|---------|--------------|---------|---------|-------|---------|
|                |         | At AUG5      | Os AUG5 | Pp AUG5 | HAUS5 | Dm Dgt5 |
| Similarity (%) | At AUG5 |              | 54.0    | 48.7    | 18.7  | 18.2    |
|                | Os AUG5 | 66.7         |         | 44.2    | 19.8  | 13.1    |
|                | Pp AUG5 | 67.1         | 61.6    |         | 19.5  | 18.4    |
|                | HAUS5   | 31.2         | 32.7    | 34.8    |       | 17.5    |
|                | Dm Dgt5 | 34.7         | 24.3    | 34.7    | 32.1  |         |

**B**

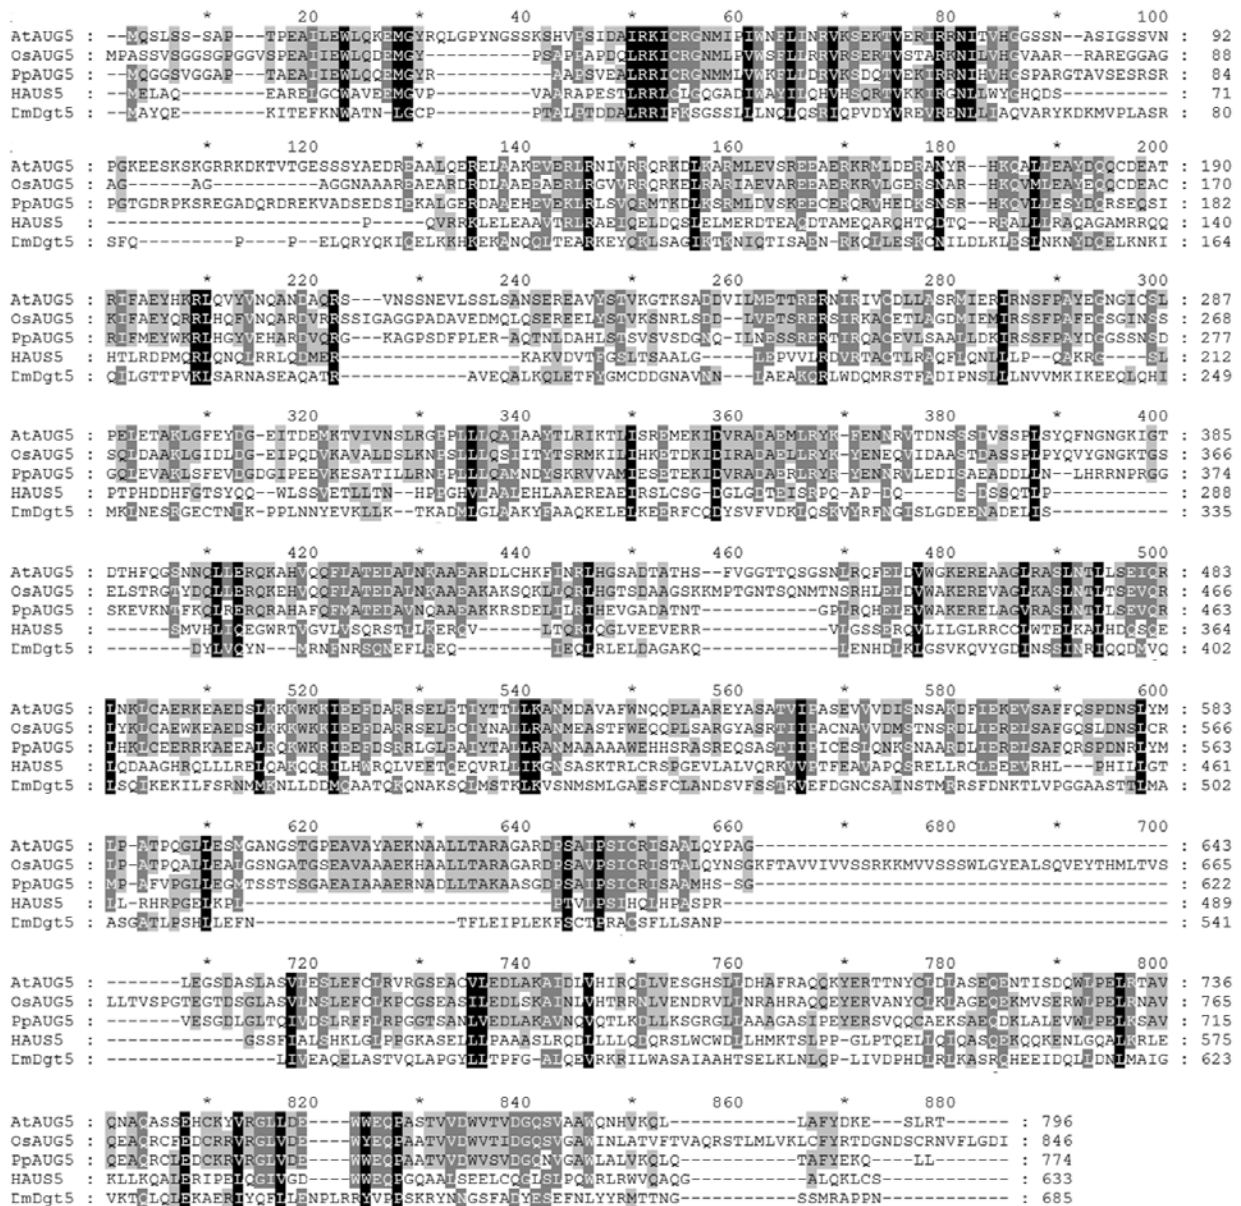

Supplemental Figure 3. Sequence comparison of plant AUG5 homologs, human HAUS5 and *Drosophila melanogaster* (fly) Dgt5. The GenBank accession

**Supplemental Data. Hotta et al. Plant Cell. (2012). 10.1105/tpc.112.096610**

**numbers are AED94368 (At5g38880, At AUG5), EEE69629 (OsJ\_29218, Os AUG5), XP\_001756819 (Pp AUG5), NP\_056117 (HAUS5), and NP\_610785 (Dm Dgt5).**

(A) Sequence identity and similarity among At AUG5, Os AUG5, Pp AUG5, human HAUS5 and Dm Dgt5.

(B) Multiple sequence alignment of plant AUG5 homologs, human HAUS5 and Dm Dgt5.

**A**

|                |         | Identity (%) |         |         |       |         |
|----------------|---------|--------------|---------|---------|-------|---------|
|                |         | At AUG6      | Os AUG6 | Pp AUG6 | HAUS6 | Dm Dgt6 |
| Similarity (%) | AtAUG6  |              | 59.9    | 32.9    | 15.0  | 19.0    |
|                | Os AUG6 | 72.2         |         | 34.5    | 16.3  | 18.0    |
|                | Pp AUG6 | 45.3         | 46.8    |         | 13.4  | 16.2    |
|                | HAUS6   | 26.8         | 26.4    | 24.6    |       | 16.1    |
|                | Dm Dgt6 | 32.2         | 31.1    | 26.0    | 26.3  |         |

**B**

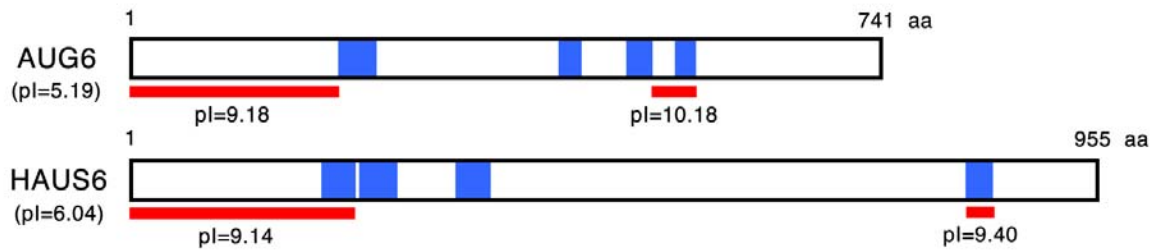

C

```

*          *          *          *          *
AtAUG6 : -----*-----20-----*-----40-----*-----60-----*-----80-----*-----100-----: -
OsAUG6 : -----*-----20-----*-----40-----*-----60-----*-----80-----*-----100-----: -
PpAUG6 : MFWSFGTRREFFYQTHFVSDLFGCTGFWRSAFVSHKGRSLADLDVDEQWTMRSPDLSDSSNLRGFKRCVKLRNYCPDREGFCVREAAFLICNMVFCFKLK : 100
HAUS6 : -----*-----20-----*-----40-----*-----60-----*-----80-----*-----100-----: -
LmDgt6 : -----*-----20-----*-----40-----*-----60-----*-----80-----*-----100-----: -

*          *          *          *          *
AtAUG6 : -----*-----120-----*-----140-----*-----160-----*-----180-----*-----200-----: 62
OsAUG6 : -----*-----120-----*-----140-----*-----160-----*-----180-----*-----200-----: 63
PpAUG6 : KGLKIQFLQAHCKKMDALLKEKDREREKENADRDREREREKEREGD-VGAAAYTNCILICGDPNVLC---PGACMRAGLFRHSNPRLGECLNIFIMC : 195
HAUS6 : -----*-----120-----*-----140-----*-----160-----*-----180-----*-----200-----: 63
LmDgt6 : -----*-----120-----*-----140-----*-----160-----*-----180-----*-----200-----: 63

*          *          *          *          *
AtAUG6 : -----*-----220-----*-----240-----*-----260-----*-----280-----*-----300-----: 162
OsAUG6 : -----*-----220-----*-----240-----*-----260-----*-----280-----*-----300-----: 163
PpAUG6 : AIRGPNLSAKDAGWPIFAAQSREFRKVVQGLINELGCGALPRNSRVSSATCCGRFVELLWHLHSAHATREVERRTFPADVASNPLPASLDELVC : 295
HAUS6 : VLD-QSLKKEVRFKQWEFECKSDTFRKHCCCEWIKRISGCGSSFPQVQGLFPLSPGGKFFIHLMYHFAFVAMKYKSNKSNSSHFFVETFNKFDLL : 162
LmDgt6 : ILD-PAEFRS--RFFWPTLRKSEANFRSSTVEYIKHNEKHCHHWAKISYLVMPGCRFNFLEFVGFVQETIQREK-SGLEAGTPNVS---- : 155

*          *          *          *          *
AtAUG6 : S-----HAAALLPVTKARIVLERRRFLKNMETAVQRCAMWSNLAHMTAEFR--GLCAEAYICCEIEKLNDRNKKVQEGEWDDLVSSSS---Q : 248
OsAUG6 : L-----HAAALLPVTKARIALERRRFLKNANIAVQRCQTWSNLAHMTAEFR--SLCAEAYICCEIEKLDNRNKKKLEGEWDERISSSSG---Q : 250
PpAUG6 : EN-----TRPVSLAVTKARIALERRRFLKNMETAVQRCQTSWSNLAHMTAEFR--ALCAEAYICCEIEKIQESSYPNVSDDSAVSDETEGFVNS--I : 384
HAUS6 : HKCIARCHEFARSRFLQLLQDCVTCRYQENQLSKQVNRNLRSECIENIHKRMEPYDDHNSNEKTKQKVRSTWASVNETLMLFEKEREVVSVLSLV : 262
LmDgt6 : L-----AKVMRQNAVMTAEAS-----SYVVNIE-----ENTLIRDKTKLIRRMADLSADMVPEEQIADDG----FL : 215

*          *          *          *          *
AtAUG6 : NSHLVS--KARRFVNDSTYARKGQ-----HEVLASGFEDLTAHREHRYRISGSALLAAMQ-----SSQVPRADLISAH----- : 315
OsAUG6 : NSHLVS--KARRFVNDSTYARKGQ-----HEVLASGFEDLTAHREHRYRISGSALLAAMQ-----SSSVPHSELSAR----- : 317
PpAUG6 : SAGFVI--RASQLKGCILSHSER-----VAELASGFEDLTAHREHRYRIDGAVLRARVVLGVSVNLFPVSSSCSTADYDSQ----- : 459
HAUS6 : NYALDGTNVATNPRPDIIDRIEKQMFQLHIGNVYEAGKINLTVICILNRYLVMRYRCCQADQARLTVLHYLEKETFKQKERLSLTKHMYRYRKDDL : 362
LmDgt6 : DEFEAT--APLQVERVITQPTER-----KFDLBSLCGLKEAIDLQFQCAENNSKBEVEK-----AURGRM----- : 276

*          *          *          *          *
AtAUG6 : -----*-----520-----*-----540-----*-----560-----*-----580-----*-----600-----: 340
OsAUG6 : -----*-----520-----*-----540-----*-----560-----*-----580-----*-----600-----: 330
PpAUG6 : -----*-----520-----*-----540-----*-----560-----*-----580-----*-----600-----: 484
HAUS6 : TTIRHSVVEKQGEWHKKWKEFLGLSPFLIKGWTPSVDLLPMSPLSFPASEEYVAKSILCQYPASLPDAHKQHNQENGCRGSDTIGALHLDLANSPAS : 462
LmDgt6 : -----*-----520-----*-----540-----*-----560-----*-----580-----*-----600-----: 296

*          *          *          *          *
AtAUG6 : LVDSEFETASSQASDETHSR-----VDRGGRIN-QTVLVAEVRRTTHAQRRHKQSL-----LAKANDCGDDELIRASDGGT-----S : 415
OsAUG6 : -----*-----620-----*-----640-----*-----660-----*-----680-----*-----700-----: 401
PpAUG6 : ITRRWTHALQTVHKQTRLLVEAVEHVIVADLLEKLN-LKNYIVAVRQKFKIISLYLRVLLGIIISGLVLKASNNCAGCEEMMESHGEE-----S : 578
HAUS6 : FTSQSVSSDRNSVIVTEK-----LTKMTPKERNEATSKKPEPEVENSTSDVAKNT-----ESSFGSLLAKKSDPFQKQDHLVVE : 543
LmDgt6 : KDALINGFNRIISGTIAEQ-----LHNDHYNESNARVTTDLQALRVES-QSEVQIN-----NLLKQNEPFSKKDK-----C : 363

*          *          *          *          *
AtAUG6 : GHVESAAITTEHQHLASFCVLLNCKEVSATQKSECTEAMNSLPPPTLPPVTRSNQCASSLLCSGSGRIMECVSNDIAETSTMSNVCKEYVSS : 515
OsAUG6 : THADSLTALIAHRRQHLVSHCGLLNCKEAIKAMQCSHADLSEVNSVSS--NPMDRISRLSPVQNSGFGRAE--SSSEIEMSTSKLSTHDKAGS : 498
PpAUG6 : VHVHSHRTLICEHKQHFSSLSRSLKNCLEASMPGMEAAITLIRVBCPDMTMAASRAQNALIVTSKTSHWVATSRLEDLEQSALEFINNSAMPLELTPS : 678
HAUS6 : VARAVSDPQLSEKGEIKLBEELISGNSNPLTRNCPRTPEINITEIRSSWRKAIEEMENRKEPIQMDAHRVLPESFVHLNQRFSMADFLLEP : 643
LmDgt6 : SANAGSARVQTLQPATPRFESVSSK-----FVS-----TPPIRIDMGGGGGRNAP---VRLALCGDFNQRQFDALNSLAPAPPRARRKALDGS : 449

*          *          *          *          *
AtAUG6 : FTTRKPLQLFSSPSSSGKGGCKRQTVASQVNRKESLSEKNSIDQAL-SNARPD-----*-----820-----*-----840-----*-----860-----*-----880-----*-----900-----: 569
OsAUG6 : PAUKRPLFLSLAPSSSGKGTCAKRNALGRQP-SCEILSEKTLPLPS--TKDET-----*-----820-----*-----840-----*-----860-----*-----880-----*-----900-----: 551
PpAUG6 : PAUKRPL--YTSANGVSTFSKAASG--SSMP-SIDVLCGEGLENG--IVWN-----*-----820-----*-----840-----*-----860-----*-----880-----*-----900-----: 726
HAUS6 : TVSDFG--QSHLEEKVISDCCVPPKHVLTSHDEPPTCNQDILLNKVICHQDLECLAFKLTSETSRMETFSPAAGNRIDVGGSEEFMILDLHLE : 740
LmDgt6 : TCGDIN--G-ILNRSKINDPMLRTHKNTSKAAPANLSSIG-----SK-----*-----820-----*-----840-----*-----860-----*-----880-----*-----900-----: 494

*          *          *          *          *
AtAUG6 : -----*-----920-----*-----940-----*-----960-----*-----980-----*-----1000-----: 645
OsAUG6 : -----*-----920-----*-----940-----*-----960-----*-----980-----*-----1000-----: 627
PpAUG6 : -----*-----920-----*-----940-----*-----960-----*-----980-----*-----1000-----: 803
HAUS6 : VSCNKPSTNKTMLWNSFGISGISSKSPDNDFCILHETPEEVGHLSFNSSSEANFKLEPNSPMHGTLLEDVVGGRCPTTPEDFNLQALRSRYEAL : 840
LmDgt6 : -----*-----920-----*-----940-----*-----960-----*-----980-----*-----1000-----: 559

*          *          *          *          *
AtAUG6 : PSFLEPNVPDSFAPSK--YSDLPDYDLDLSD--FKDYDNGGFLSAGS--NSVASDAQCSFYDIDDQVFSFPTLNDSS---LLSDAYEDLVAHT : 731
OsAUG6 : MKESDLHFN--VDSF--MHATVYSSKLN-----GHDDRTVTSLLDP-----VSGGHQSFITDLDLQVFSFPLLETS---LFCDAYEDLVAHT : 707
PpAUG6 : PTFPSENDRDVEEK--NGYVADPCNFVRGVPMSRKGILGRQHERSSWKSPhDLPQRTSELVHDFQPTSSSLFDCNSFDRTEFGDTYDNLVAAP : 900
HAUS6 : KRSKSKREESVLSNSGTPRHRKPELSPTPQN--VQDTEFLFLDCLDHL--TEHKPSLRISIGERKRSPLKFSFV--EQLRRTIACSGSD : 931
LmDgt6 : IKVIEVSRNVLNIST--PSGRIDAVPHTES--HQQDVAP--R--QLN--DRTINDSLQ-----LDFDFNEND--KNAENVSHKFDQDC : 635

*
AtAUG6 : S--ETEAALVEH----- : 741
OsAUG6 : S--ETATALVEH----- : 717
PpAUG6 : T--DLSAFMSIGDRRETRAI-- : 919
HAUS6 : PNLKEDLILNKSLDAKEPPSDLTR : 955
LmDgt6 : G--GSDLLQNSDSVLYK--DIIF : 654

```

**Supplemental Figure 4. Sequence comparison of plant AUG6 homologs, human HAUS6 and Dm Dgt6. The GenBank accession numbers are NP\_568585 (At5g40740, At AUG6), NP\_001046716(Os02g0329300, Os AUG6), XP\_001773092 (Pp AUG6), NP\_060115 (HAUS6), and AAF56860 (Dm Dgt6).**

(A) Sequence identity and similarity among At AUG6, Os AUG6, Pp AUG6, HAUS6 and Dm Dgt6.

(B) Schematic diagram of At AUG6 and HAUS6. Coiled-coil motifs were indicated in blue. Basic regions are indicated with red bars and theoretical pI values.

(C) Multiple sequence alignment of plant AUG6 homologs, HAUS6 and Dm Dgt6.

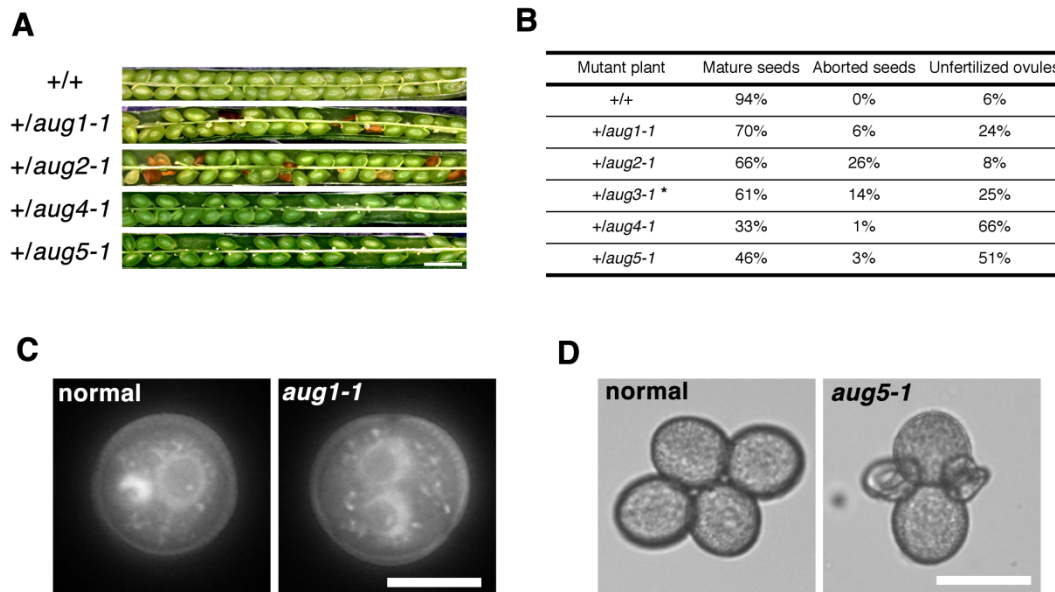

**Supplemental Figure 5. Phenotypes caused by the *aug1-1*, *aug2-1*, *aug4-1* and *aug5-1* mutations.**

(A) Defects in developing fruits/siliques in the mutants. Compared to the siliques produced by the +/+ (WT) control plant, heterozygous *aug1-1*, *aug2-1*, *aug4-1* and *aug5-1* mutants contain white unfertilized ovules and brown aborted seeds. Bar = 1 mm.

(B) Percentages of normal seeds, unfertilized ovules (white), and aborted seeds (brown) in siliques produced by the control (+/+) and heterozygous mutants.

(C) DNA staining of control and defective pollen grains produced by an +/*aug1-1* plant. A control pollen grain after mitosis I contains a brightly stained generative nucleus and a less bright vegetative nucleus (left panel). A defective pollen grain contains two identically stained nuclei resembling the vegetative nucleus (right panel). Bar = 10  $\mu$ m.

(D) Attached tetrad pollen grains produced by the +/*aug5-1* *qrt/qrt* plant. A normal tetrad contains fully enlarged four pollen grains attached together (left panel). A tetrad produced by the +/*aug5-1* *qrt/qrt* plant contains two enlarged pollen grains and two shrunken pollen grains (right panel). Some attached tetrads contained three enlarged pollen grains. Bar = 30  $\mu$ m.



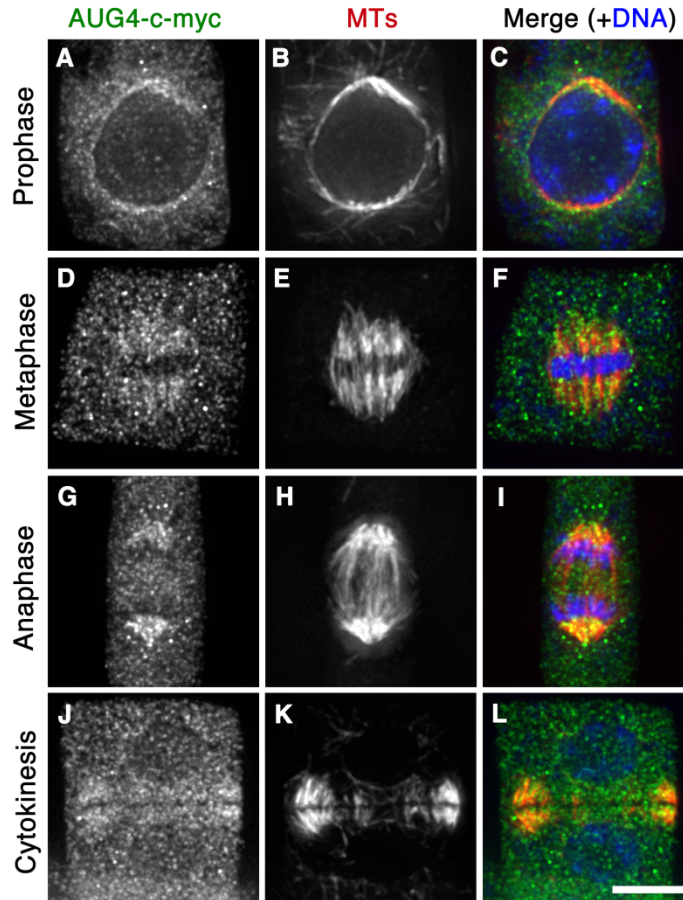

**Supplemental Figure 6. Localization of AUG4-c-myc in mitotic root cells. In merged images, AUG4 is pseudocolored in green, MTs in red, and DNA in blue. Bar = 5  $\mu$ m.**

(A-C) AUG4-c-myc signal appears along MTs of prophase spindle on the nuclear envelope.

(D-F) AUG4-c-myc localizes along kinetochore fiber MTs in the metaphase spindle.

(G-I) AUG4-c-myc signal is enhanced on the shortening kinetochore fiber MTs during anaphase.

(J-L) AUG4-c-myc signal decorates phragmoplast MTs.

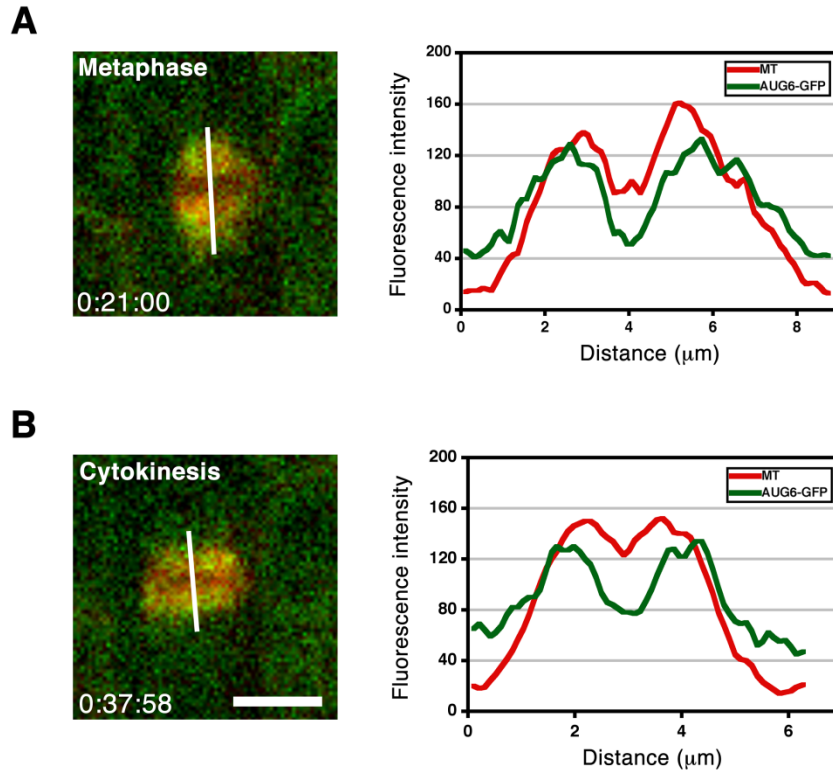

**Supplemental Figure 7. Measurement of the fluorescence intensity of AUG6-GFP in the metaphase spindle and phragmoplast shown in Figure 3M.**

(A) and (B) The fluorescence intensities of AUG6-GFP and mCherry-TUB6 are measured in the spindle (A) and phragmoplast (B) along white lines indicated in the left panels. Both graphs on the right show that the AUG6-GFP signal is biased toward minus ends of MTs. Bars = 5  $\mu\text{m}$ .

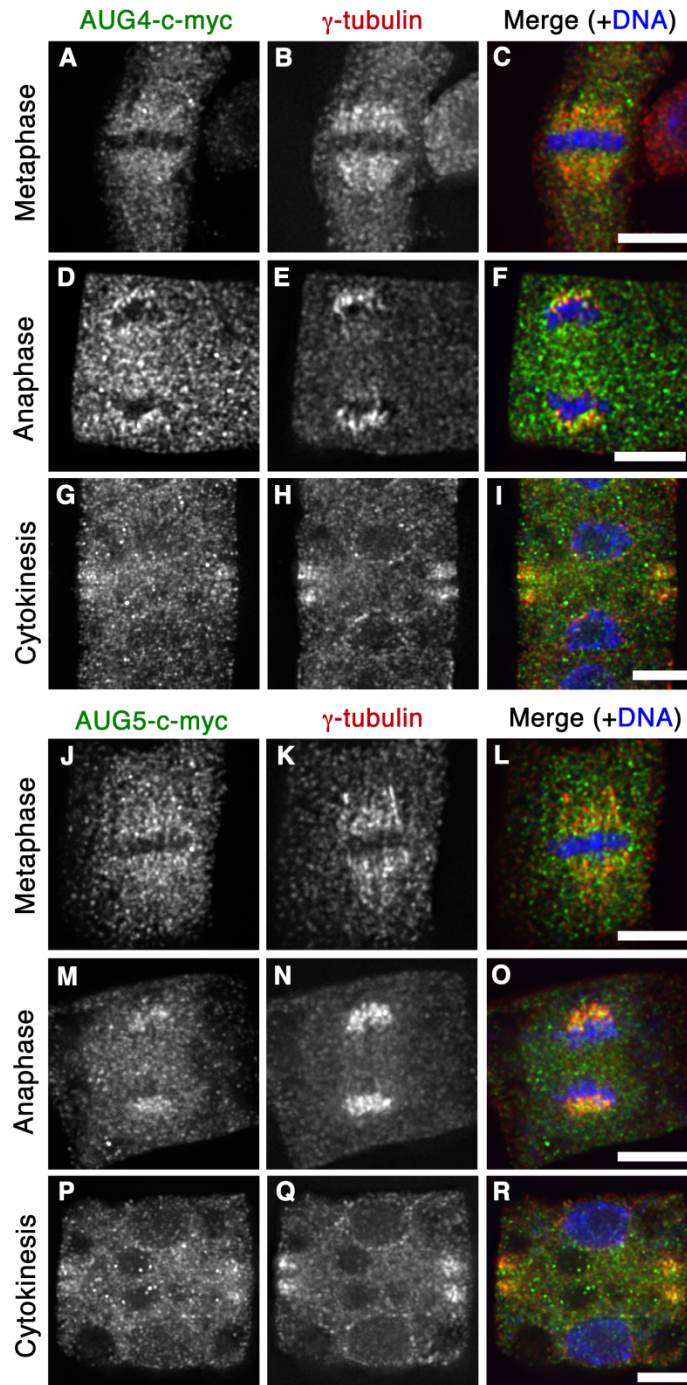

**Figure 8. Dual localizations of AUG4/AUG5 and  $\gamma$ -tubulin. In the merged images, AUG4 or AUG5 are shown in green,  $\gamma$ -tubulin in red and DNA in blue. Bars = 5  $\mu$ m.**

(A-I) AUG4-c-myc and  $\gamma$ -tubulin. (J-R) AUG5-c-myc and  $\gamma$ -tubulin. Both AUG4 and AUG5 colocalize with  $\gamma$ -tubulin in metaphase (A-C, J-L), anaphase (D-F, M-O), and cytokinesis (G-I, P-R).

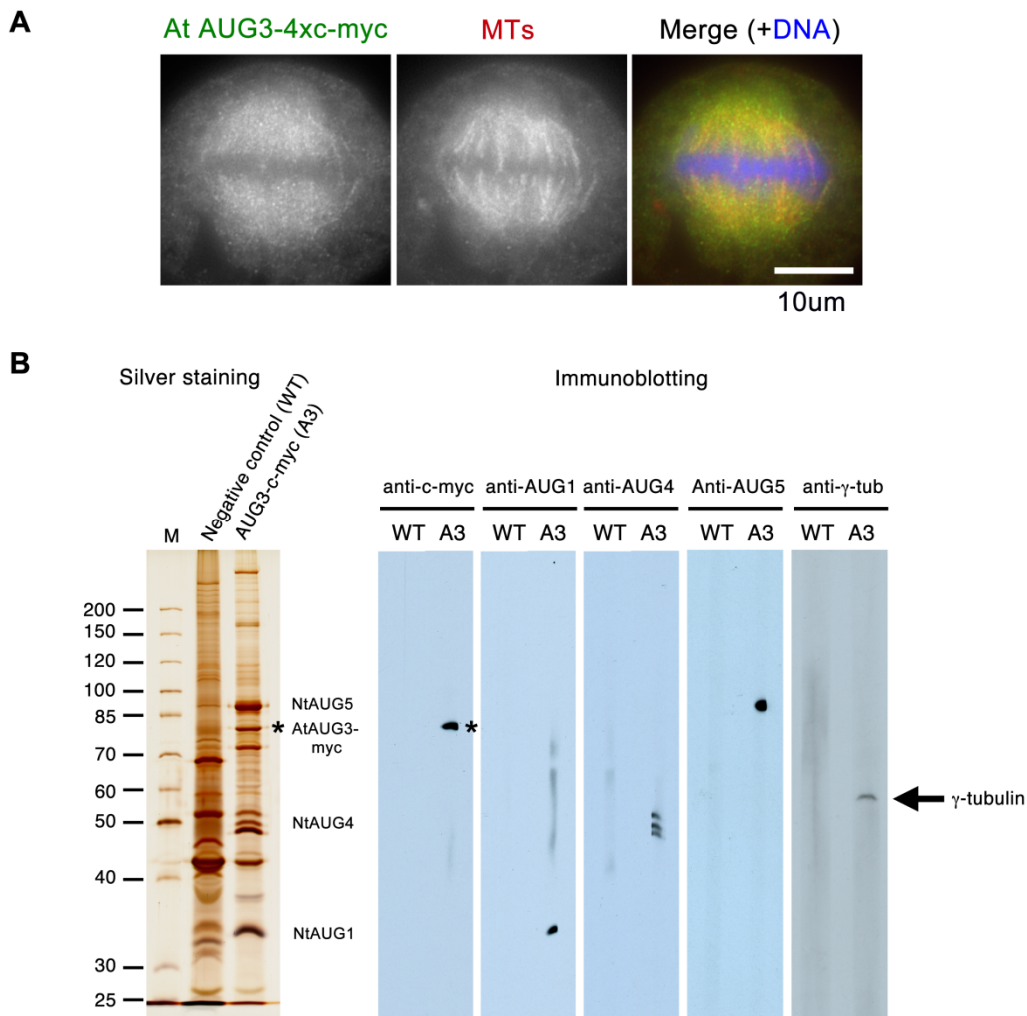

**Supplemental Figure 9. Detection of the interaction between augmin and  $\gamma$ -tubulin *in vivo*.**

(A) At AUG3-c-myc localization inside the spindle of a BY-2 cell. AUG3 signal decorates along spindle MTs as seen in the *Arabidopsis* cells. In the merged image, AUG3 is shown in green, MTs in red, and DNA in blue. Bar = 10  $\mu$ m.

(B) At AUG3-c-myc forms a complex with tobacco augmin subunits. When At AUG3-c-myc is enriched by immuno-affinity purification from BY-2 cells expressing the protein, at least three tobacco augmin subunits can be detected by immunoblotting using anti-AUG1, anti-AUG4 and anti-AUG5 antibodies (right panel, immunoblotting).  $\gamma$ -Tubulin is also detected by an anti- $\gamma$ -tubulin antibody (arrow). The bait, At AUG3-c-myc is marked by asterisks.

**A**

|                |        | Identity (%) |        |        |        |
|----------------|--------|--------------|--------|--------|--------|
|                |        | AtAUG7       | LeNMP1 | OsAUG7 | PpAUG7 |
| Similarity (%) | AtAUG7 |              | 83.1   | 71.1   | 57.2   |
|                | LeNMP1 | 90.9         |        | 72.9   | 60.7   |
|                | OsAUG7 | 85.5         | 88.0   |        | 59.5   |
|                | PpAUG7 | 76.8         | 77.7   | 77.7   |        |

**B**

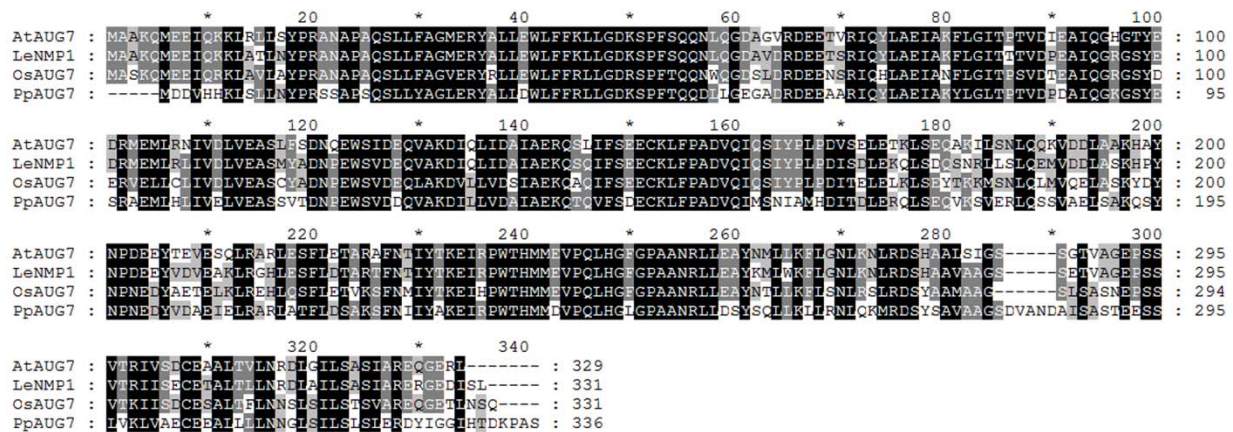

**Supplemental Figure 10. Sequence comparison of the AUG7 homologs. The GenBank accession numbers are NP\_568354 (At5g17620, At AUG7), NP\_001234492 (SI NMP1), NP\_001044927 (Os01g0869500, Os AUG7), and XP\_001777152 (Pp AUG7).**

(A) Sequence identity and similarity among At AUG7, SI NMP1 (tomato AUG7 homolog), Os AUG7, Pp AUG7.

(B) Multiple sequence alignment of plant AUG7 homologs. Conserved (identical and similar) residues among all proteins are boxed in black and those partially conserved in gray. AUG7 is highly conserved in the plant kingdom.

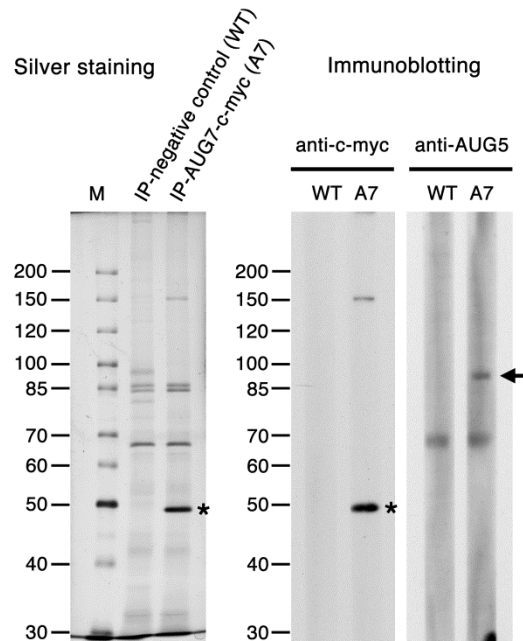

**Supplemental Figure 11. Interaction of AUG7 and AUG5 *in vivo*.**

Proteins were extracted from transgenic Arabidopsis plants expressing AUG7-c-myc, and the fusion protein was enriched by anti-c-myc affinity purification (left panel, silver staining). In addition to AUG7-c-myc revealed by the anti-c-myc antibody (asterisks), AUG5 was detected by the anti-AUG5 antibody (arrow in the right panel).

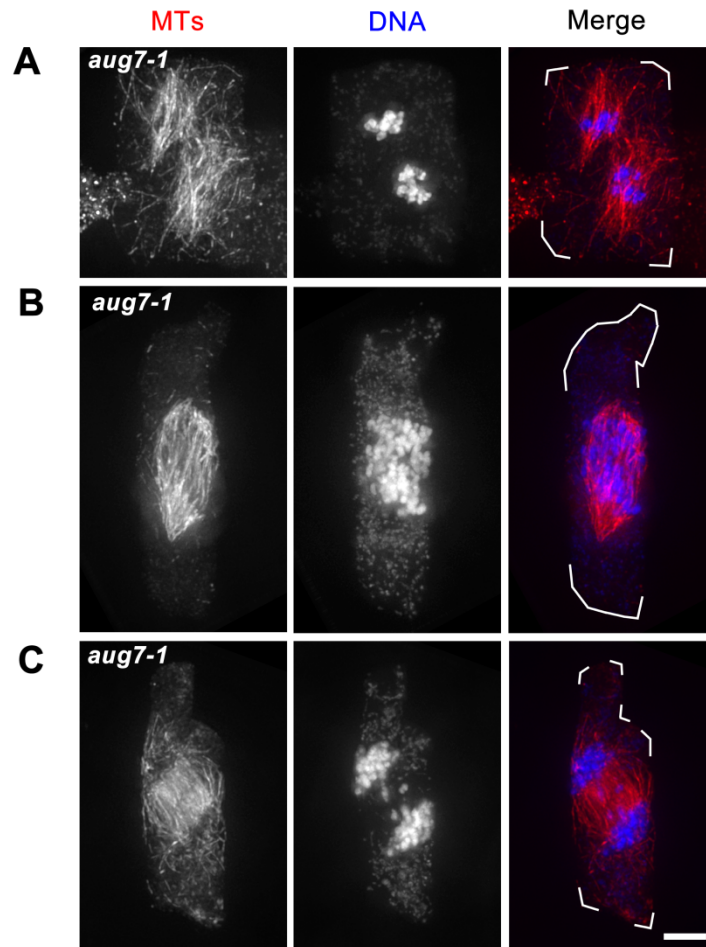

**Supplemental Figure 12. Dividing *aug7-1* cells with excessive numbers of chromosomes. MTs are shown in red and DNA in blue. Cell outline is indicated by white frames. Bar = 5  $\mu$ m.**

(A) A cell undergoing mitosis contains two metaphase spindles.

(B) An anaphase cell with excessive number of chromosomes.

(C) Phragmoplast is formed between two reforming nuclei containing excessive number of chromosomes.

**Supplemental Table 1. List of the peptides identified in the LC-MS/MS analysis corresponding to Figure 1. Sample #, as the number shown in Figure 1A; Gene ID, genetic locus identified by TAIR; # peptide, number of unique peptides; peptide sequence, sequences of unique peptides identified.**

| Sample# | Gene ID   | Gene Name | # peptides | Peptide sequence                                                                                                                                                                                                                                                                                                                                                                                                                                                                                                                                                                                                                                                                                                                                                                                                                                                                                                                                                                                                      |                                                                                                                                                                                                                                                                                                                                                                |    |                                                                                                                                                                                          |
|---------|-----------|-----------|------------|-----------------------------------------------------------------------------------------------------------------------------------------------------------------------------------------------------------------------------------------------------------------------------------------------------------------------------------------------------------------------------------------------------------------------------------------------------------------------------------------------------------------------------------------------------------------------------------------------------------------------------------------------------------------------------------------------------------------------------------------------------------------------------------------------------------------------------------------------------------------------------------------------------------------------------------------------------------------------------------------------------------------------|----------------------------------------------------------------------------------------------------------------------------------------------------------------------------------------------------------------------------------------------------------------------------------------------------------------------------------------------------------------|----|------------------------------------------------------------------------------------------------------------------------------------------------------------------------------------------|
| 1       | At5g38880 | AUG5      | 50         | AGARDPSAIPICR<br>AHVQOFLATEDALNK<br>AHVQOFLATEDALNKAAEAR<br>AIDLWHR<br>ANMDAVAFWVWQOPLAAR<br>DKTVTGESSSYAEDR<br>DPSAIPICR<br>EAVYSTVK<br>ELAAKEVER<br>EVLSSLSANSE<br>FENNRVTDNSSSDVSSPLSYQFNNGK<br>GNMIPWFLINR<br>GSEACVLEDLAK<br>HKQALLEAYDQCCDEATR<br>IFAEYHGR<br>IGTDTHFGGSSNOLLER<br>IRNSFPAYEGNGICSLPELETAK<br>IVCDLLASR<br>KEAEDSLKKK<br>LGFEDYDGEITDEM<br>LHGSADTATHSFPVGGTTQSGSNLR<br>LNKLCAR<br>LOVYVNOANDAQR<br>MLEVSRREEAER<br>NAALLTAR<br>NITVHGGSSNASIGSSVNPQKEESK<br>NSFPAYEGNGICSLPELETAK<br>OALLEAYDQCCDEATR<br>ODLVESGHSLLDHAFR<br>QFELDVWGKER<br>QKAHVQOFLATEDALNK<br>QKAHVQOFLATEDALNKAAEAR<br>QLGPNYSSSK<br>QLLAFYDKESLRT<br>RLOVYVNOANDAQR<br>RNITVHGGSSNASIGSSVNPQKEESK<br>RSELETIYTLLK<br>SADDVILMETTR<br>SADDVILMETTRER<br>SHVPSIDAIR<br>SVNSSNEVLSSLSANSE<br>SVNSSNEVLSSLSANSEREAVYSTVK<br>TAVONQAASSEHCK<br>TIYTLLKANMDAVAFWVWQOPLAAR<br>TVTGESSSYAEDR<br>TVTGESSSYAEDREAALQER<br>TVTGESSSYAEDREAALQERELAAK<br>VRGSEACVLEDLAK<br>VTDNSSSDVSSPLSYQFNNGK<br>VTDNSSSDVSSPLSYQFNNGKIGTDTHFGGSSN |                                                                                                                                                                                                                                                                                                                                                                |    |                                                                                                                                                                                          |
|         |           |           |            | At5g48520                                                                                                                                                                                                                                                                                                                                                                                                                                                                                                                                                                                                                                                                                                                                                                                                                                                                                                                                                                                                             | AUG3                                                                                                                                                                                                                                                                                                                                                           | 10 | ALIQRRRARVAATSAVSGQITAIEDLSAR<br>KNMLGAFSLK<br>LOTQYDLLTGSSALIQGR<br>LSTAVEEVLEHR<br>QWIEAQVENAK<br>RNNQEAVFGEESIKEVR<br>RVFVDFCNP<br>VAATSAVSGQITAIEDLSAR<br>VFVDFCNP<br>VIESELOGVLSATR |
|         |           |           |            | At5g40740                                                                                                                                                                                                                                                                                                                                                                                                                                                                                                                                                                                                                                                                                                                                                                                                                                                                                                                                                                                                             | AUG6                                                                                                                                                                                                                                                                                                                                                           | 6  | ANGDGFILR<br>DSQSDGSEHIFVPLSATGFSR<br>EALLIPSSAGSSR<br>LPQLFSSTPTSSGK<br>VKQEGEVWDLVSSSQNSHLVSK<br>VSASPTLKLPLFSSTPTSSGK                                                                 |
| 2       | At5g48520 | AUG3      | 10         | DATLAHKAELQLR<br>LOTQYDLLTGSSALIQGR<br>LSTAVEEVLEHR<br>LSTAVEEVLEHRNKREIV<br>LVAEEGSK<br>NLQMGVLR<br>QLDTGPYRLVAEKG<br>RNNQEAVFGEESIKEVR<br>RNNQEAVFGEESIKEVR<br>VFVDFCNP                                                                                                                                                                                                                                                                                                                                                                                                                                                                                                                                                                                                                                                                                                                                                                                                                                             |                                                                                                                                                                                                                                                                                                                                                                |    |                                                                                                                                                                                          |
|         |           |           |            | At5g38880                                                                                                                                                                                                                                                                                                                                                                                                                                                                                                                                                                                                                                                                                                                                                                                                                                                                                                                                                                                                             | AUG5                                                                                                                                                                                                                                                                                                                                                           | 2  | IVCDLLASR<br>LHGSADTATHSFPVGGTTQSGSNLR                                                                                                                                                   |
|         | 3         | At1g50710 | AUG4       | 18                                                                                                                                                                                                                                                                                                                                                                                                                                                                                                                                                                                                                                                                                                                                                                                                                                                                                                                                                                                                                    | CDKLADAVDDTDSSTGNR<br>CDKLADAVDDTDSSTGNRSSAR<br>DVQGLYPQLGLK<br>EKCDKLADAVDDTDSSTGNR<br>EYQGVDPHFDIAR<br>HCLAPDGLVTK<br>KAVTRLREYQGVDPHFDIAR<br>KLENMOWTHIQVEMDLK<br>LADAVDDTDSSTGNR<br>LADAVDDTDSSTGNRSSAR<br>LKEKCDKLADAVDDTDSSTGNR<br>LPLISDGGIHEEIEK<br>LREYQGVDPHFDIAR<br>LVVAEAAQK<br>NSPOVYVLEHR<br>NSPOVYVLEHRLVVAEAAQK<br>SVYSDQLAR<br>SVYSDQLAREEMSR |    |                                                                                                                                                                                          |
|         | At5g38880 | AUG5      | 3          | IVCDLLASR<br>NITVHGGSSNASIGSSVNPQKEESK<br>SVNSSNEVLSSLSANSE                                                                                                                                                                                                                                                                                                                                                                                                                                                                                                                                                                                                                                                                                                                                                                                                                                                                                                                                                           |                                                                                                                                                                                                                                                                                                                                                                |    |                                                                                                                                                                                          |
| 4       | At2g41350 | AUG1      | 33         | AKAKESNALLDYTR<br>AKAKESNALLDYTRK<br>ALALAIEDK<br>ALALAIEDKKR<br>AQKESNALLDYTR<br>AQKESNALLDYTRK<br>ASEYRAQAAR<br>AWLTSQFEAVGK<br>EEQYIQQYK<br>ELDKMTKPVLDLTLR<br>ELVEMAEHR<br>ELVEMAEHRK<br>ELVEMAEHRKELDKMTKPVLDLTLR<br>ESNALLDYTR<br>ESNALLDYTRK<br>EVPNFEYTHR<br>ILAQLEDDVVPCEOMENWK<br>ISEVKAWLTSQFEAVGK<br>ISHRELVEMAEHRK<br>KELDKMTKPVLDLTLR<br>MTKPVLDLTLR<br>SDVTGDAAVSEAKGSSDAAR<br>SDVTGDAAVSEAKGSSDAAR<br>SITHLYNLATASQAK<br>SOAATIVANDFR<br>SOAATIVANDFRK<br>SYQDLPPDK<br>SYQDLPPDKALALAIEDK<br>SYQDLPPDKALALAIEDKKR<br>TNLEVMVAVKEEQYIQQYK<br>TNLEVMVAVKEEQYIQQYK<br>YEMLLNR<br>YLEEVLSQALETNDE                                                                                                                                                                                                                                                                                                                                                                                                         |                                                                                                                                                                                                                                                                                                                                                                |    |                                                                                                                                                                                          |
|         |           |           |            | At2g32980                                                                                                                                                                                                                                                                                                                                                                                                                                                                                                                                                                                                                                                                                                                                                                                                                                                                                                                                                                                                             | AUG2                                                                                                                                                                                                                                                                                                                                                           | 1  | ITQIKDVIGNKDR                                                                                                                                                                            |



**Supplemental Table 2. Transmission efficiency (TE) of *aug* mutant alleles in reciprocal crosses between heterozygous mutants (+*aug*) and WT (+/+) plants.**

| Mutant tested                | Progeny genotype when mutant as pollen donor | TE <sub>male</sub> <sup>b</sup> | Progeny genotype when mutant as ovule donor | TE <sub>female</sub> <sup>b</sup> |
|------------------------------|----------------------------------------------|---------------------------------|---------------------------------------------|-----------------------------------|
| + <i>aug1-1</i>              | 20 + <i>aug</i> : 167 +/+                    | 12% <sup>c</sup>                | 39 + <i>aug</i> : 108 +/+                   | 36% <sup>c</sup>                  |
| + <i>aug2-1</i>              | 54 + <i>aug</i> : 74 +/+                     | 73% <sup>d</sup>                | 62 + <i>aug</i> : 91 +/+                    | 68% <sup>d</sup>                  |
| + <i>aug3-1</i> <sup>a</sup> | 61 + <i>aug</i> : 102 +/+                    | 60% <sup>c</sup>                | 49 + <i>aug</i> : 131 +/+                   | 37% <sup>c</sup>                  |
| + <i>aug4-1</i>              | 14 + <i>aug</i> : 106 +/+                    | 13% <sup>c</sup>                | 30 + <i>aug</i> : 94 +/+                    | 32% <sup>c</sup>                  |
| + <i>aug5-1</i>              | 75 + <i>aug</i> : 138 +/+                    | 54% <sup>c</sup>                | 36 + <i>aug</i> : 80 +/+                    | 45% <sup>c</sup>                  |

**Note:**

<sup>a</sup> Ho *et al.* (2011b)

<sup>b</sup> TE = (number of +*aug* progeny)/(number of +/+ progeny) x 100%

<sup>c</sup> The probability calculated by the chi-square test based on the expected TE = 100% (or 1 +*aug* : 1+/+ segregation) was smaller than 0.001.

<sup>d</sup> The probability calculated by the chi-square test based on the expected TE = 100% (or 1 +*aug* : 1+/+ segregation) was between 0.01 and 0.1.

**Supplemental Table 3. List of the peptides identified in the LC-MS/MS analysis corresponding to Figure 4. Sample #, as specific immune-purification experiments shown in Figure 4C; Gene ID, genetic locus identified by TAIR; # peptide, number of unique peptides; peptide sequence, sequences of unique peptides identified.**

| Sample#     | Gene ID   | Gene Name | # peptides                                                                                                                                                                                                                                                                                                                                                                                                                                                                                                                                                                                                                                                                                        | Peptide sequence                                                                                                                                                                                                                                                                                                                                                                                                                                                                                     |
|-------------|-----------|-----------|---------------------------------------------------------------------------------------------------------------------------------------------------------------------------------------------------------------------------------------------------------------------------------------------------------------------------------------------------------------------------------------------------------------------------------------------------------------------------------------------------------------------------------------------------------------------------------------------------------------------------------------------------------------------------------------------------|------------------------------------------------------------------------------------------------------------------------------------------------------------------------------------------------------------------------------------------------------------------------------------------------------------------------------------------------------------------------------------------------------------------------------------------------------------------------------------------------------|
| AUG3-myc IP | At2g41350 | AUG1      | 15                                                                                                                                                                                                                                                                                                                                                                                                                                                                                                                                                                                                                                                                                                | ALAALAIEDK<br>AWLTSQFEAVGK<br>ESNALLDYTR<br>ESNALLDYTRK<br>EVPNFEYTHR<br>ILAQLEDDVVPCEQSMENWK<br>KYEOMLLNR<br>MTKPVLDTLR<br>SDVTGDLAAVSEAK<br>SITHLYNLATASQAK<br>SQAATIVANDFR<br>SYQDLPPDKALAALAIEDK<br>TNLEVMVAVKEEQYIQQYK<br>TNLEVMVAVKEEQYIQQYK<br>YLEEVLQSALETNDE                                                                                                                                                                                                                                |
|             | At5g48520 | AUG3      | 25                                                                                                                                                                                                                                                                                                                                                                                                                                                                                                                                                                                                                                                                                                | ALIQRRRARVAATSAVSGQITAIEDLSAR<br>CSALIQAAADVQEOGAVDDRRDLSFLHGVR<br>CSWVSLDDTSMNLR<br>DATLAHKAEALELQR<br>HADLVEEISTLYQK<br>HADLVEEISTLYQKEEK<br>KHADLVEEISTLYQK<br>KHADLVEEISTLYQKEEK<br>KNMLGAFSLK<br>LLEGDDLDQAYDSISAFSSR<br>LQTQYDLLTGQSSALIQR<br>LSTAVEEVTLEHR<br>NLQMGVGLGR<br>NMLGAFSLK<br>NNOEAVFGAEESIKEVR<br>QWIEAQVENAK<br>RLQTYDLLTGQSSALIQR<br>RNNQEAIVFGAEESIK<br>RVFVDFCNPFR<br>SQVTSVEAHIFDLHSLR<br>VAATSAVSGQITAIEDLSAR<br>VFINHLVNLQAR<br>VFVDFCNPFR<br>VIESELOGYLSATR<br>VMRQELYISK |
|             | At1g50710 | AUG4      | 16                                                                                                                                                                                                                                                                                                                                                                                                                                                                                                                                                                                                                                                                                                | CDKLADAVDDTDSSTGNR<br>DVQGLYPQLGK<br>EYQGVDPHFDTIAR<br>FIIIEIERDEAALR<br>FIIIEIERDEAALREDLYSADRK<br>HCLAPDGLVTK<br>KLENMQWTIHQVEMDLK<br>LETYTPDISALHNIR<br>LPLISDGGIEHEEIEK<br>LREYQGVDPHFDTIAR<br>LRLPLISDGGIEHEEIEK<br>LVVAEAAQK<br>NSPQVYETLEHR<br>NYLVEATEEASAAYNK<br>SVYSDLQLAR<br>VLENVLLLETYTPDISALHNIR                                                                                                                                                                                       |
| At5g98880   | AUG5      | 35        | AGARDPSAIPSICR<br>AHVQQFLATEDALNK<br>AIDLVIHR<br>ANMDAVAFWNOQPLAAR<br>ASLNTLLSEIQR<br>DKTYTGESSYAEDREAALQER<br>EYASATVIPASEVVDISNSAK<br>GSEACVLEDAK<br>HKOALLEAYDQCCDEATR<br>IFAEYHKR<br>IGDTHFQGSNNOLLER<br>IVCDLLASR<br>LGFYDGEITDEM<br>LHGSADTATHSVGGTTQSGSNLR<br>LQVYVNOANDAQR<br>NAALLTAR<br>NITVHGGSSNASIGSSVNPKEESK<br>NSFPAYEGNGICSLPELETAK<br>QALLEAYDQCCDEATR<br>ODLVESGSHLLDHAFR<br>OKAHVQFLATEDALNK<br>QLLAFYDKE<br>QLLAFYDKESLRT<br>RNITVHGGSSNASIGSSVNPKEESK<br>RSELETIYTLK<br>SADDVILMETTR<br>SELETIYTLK<br>SHVPSIDAIR<br>SHVPSIDAIRK<br>SVNSSNEVLSLSANSER<br>TYITLLKNMDAVAFWNOQPLAAR<br>TNYCLDLASEQENTISQWLPCLR<br>TVTGESSYAEDREAALQER<br>VRGSEACVLEDAK<br>VTDNSSSDVSSPLSYQFNQNGK |                                                                                                                                                                                                                                                                                                                                                                                                                                                                                                      |

| Sample#                    | Gene ID   | Gene Name | # peptides | Peptide sequence                                                                                                                                                                                                                                                                                                                                                                                                                                                                                                                                                                                                                                                                                                                                       |
|----------------------------|-----------|-----------|------------|--------------------------------------------------------------------------------------------------------------------------------------------------------------------------------------------------------------------------------------------------------------------------------------------------------------------------------------------------------------------------------------------------------------------------------------------------------------------------------------------------------------------------------------------------------------------------------------------------------------------------------------------------------------------------------------------------------------------------------------------------------|
| AUG3-myc IP<br>(continued) | At5g40740 | AUG6      | 2          | SNGQASSLLQSQSSGR<br>VKQEGEVWDDLVSSSQNSHLVSK                                                                                                                                                                                                                                                                                                                                                                                                                                                                                                                                                                                                                                                                                                            |
|                            | At5g17620 | AUG7      | 5          | ANAPAGSLLFAGMER<br>DLGILSASIAFR<br>IVSDCEAALTVLNR<br>LFPADYVQISYPLPDVSELETK<br>SPFSQONLQGDAGVREDETVR                                                                                                                                                                                                                                                                                                                                                                                                                                                                                                                                                                                                                                                   |
|                            | At4g30710 | AUG8      | 2          | CPSPSVTRPTVSSSSQSVAAK<br>RATLATAVARLHPLPAPGSRPASPFR                                                                                                                                                                                                                                                                                                                                                                                                                                                                                                                                                                                                                                                                                                    |
| AUG4-myc IP                | At2g41350 | AUG1      | 25         | ALAALAIEDK<br>ALAALAIEDKK<br>ALAALAIEDKKR<br>AWLTSQFEAVGK<br>DTESSFLVAMGDISLR<br>DTESSFLVAMGDISLRK<br>DTESSFLVAMGDISLRKTGVEEKR<br>ELVEMAEHR<br>ESNALLDYTR<br>ESNALLDYTRK<br>EVPNFEYTHR<br>ILAQLEDDVVPCEQSMENWK<br>KILAQLEDDVVPCEQSMENWK<br>KYEOMLLNR<br>MTKPVLDTLR<br>SDVTGDLAAVSEAK<br>SITHLYNLATASQAK<br>SQAATIVANDFR<br>SYQDLPPDK<br>SYQDLPPDKALAALAIEDK<br>TNLEVMVAVK<br>TNLEVMVAVKEEQYIQQYK<br>YEMLLNR<br>YLEEVLQSALE<br>YLEEVLQSALETNDE                                                                                                                                                                                                                                                                                                          |
|                            | At2g32980 | AUG2      | 8          | ESFATLQELR<br>FFEAMSAMR<br>IADLQVELQGR<br>IESSFDLAVHK<br>KIADLQVELQGR<br>LQQPSYSLDCIPVEAEYOK<br>LSVYORKIADLQVELQGR<br>NVAHLTHVGMOK                                                                                                                                                                                                                                                                                                                                                                                                                                                                                                                                                                                                                     |
|                            | At5g48520 | AUG3      | 39         | ALIQRRRARVAATSAVSGQITAIEDLSAR<br>CSALIQAAADVQEOGAVDDRRDLSFLHGVR<br>CSWVSLDDTSMNLR<br>CSWVSLDDTSMNLRDLEK<br>DATLAHKAEALELOR<br>DGKLEGGDDLQAYDSISAFSSR<br>DSFLHGVR<br>HADLVEEISTLYQK<br>HADLVEEISTLYQKEEK<br>KHADLVEEISTLYQK<br>KHADLVEEISTLYQKEEK<br>KNMLGAFSLK<br>LACQLEK<br>LCSLVAELGYEGAGK<br>LLEGDDLQAYDSISAF<br>LLEGDDLQAYDSISAFSSR<br>LLETIPCLWELAQDQTYLQGDYDLK<br>LQTQYDLLTGQSSALIQR<br>LSTAVEEVTLEHR<br>NLQMGVGLGR<br>NMLGAFSLK<br>NNOEAVFGAEESIK<br>NNOEAVFGAEESIKEVR<br>QKVFINHLVNLQAR<br>QOAILTLK<br>QWIEAQVENAK<br>RLQTYDLLTGQSSALIQR<br>RNNQEAIVFGAEESIK<br>RNNQEAIVFGAEESIKEVR<br>RVFVDFCNPFR<br>SIFGTSER<br>SQVTSVEAHIFDLHSLR<br>VAATSAVSGQITAIEDLSAR<br>VFINHLVNLQAR<br>VFVDFCNPFR<br>VIESELOGYLSATR<br>VMRQELYISK<br>WELAQDQTYLQGDYDLK |
|                            | At1g50710 | AUG4      | 37         | AICYEAVMVEEYQQAISVANHGGR<br>ALQGAQNLPADVNLQIDQLER<br>AVDTRVGGVFN<br>CDKLADAVDDTDSSTGNR<br>DEAALREDLYSADR<br>DEAALREDLYSADRK<br>DVQGLYPQLGK<br>EDLYSADRK<br>EYQGVDPHFDTIAR<br>FIIIEIERDEAALR                                                                                                                                                                                                                                                                                                                                                                                                                                                                                                                                                            |

Supplemental Data. Hotta et al. Plant Cell. (2012). 10.1105/tpc.112.096610

| Sample#                    | Gene ID                  | Gene Name           | # peptides | Peptide sequence                                                                                                                                                                                                                                                                                                                                                                                                                                                                                                                                                                                                                                                                                                                                                                                                                                                                                                                                                                                                                                                                                                                                                                                                                                                                                                                                                                                                                                                                                                                                                                                                                                                                                                                                                                                                                                                                                                                                                                                                                                                                                                                                                                                                                                                                                                                                               |
|----------------------------|--------------------------|---------------------|------------|----------------------------------------------------------------------------------------------------------------------------------------------------------------------------------------------------------------------------------------------------------------------------------------------------------------------------------------------------------------------------------------------------------------------------------------------------------------------------------------------------------------------------------------------------------------------------------------------------------------------------------------------------------------------------------------------------------------------------------------------------------------------------------------------------------------------------------------------------------------------------------------------------------------------------------------------------------------------------------------------------------------------------------------------------------------------------------------------------------------------------------------------------------------------------------------------------------------------------------------------------------------------------------------------------------------------------------------------------------------------------------------------------------------------------------------------------------------------------------------------------------------------------------------------------------------------------------------------------------------------------------------------------------------------------------------------------------------------------------------------------------------------------------------------------------------------------------------------------------------------------------------------------------------------------------------------------------------------------------------------------------------------------------------------------------------------------------------------------------------------------------------------------------------------------------------------------------------------------------------------------------------------------------------------------------------------------------------------------------------|
| AUG4-myc IP<br>(continued) | At1g50710<br>(continued) | AUG4<br>(continued) | 37         | <p>                     FIIEIERDEAALREDLYSADR<br/>                     GAAQNLPADVNLIDQLER<br/>                     HCLAPDGSGLVTK<br/>                     IEEIERDEAALR<br/>                     KAVTFLREYQGVDPHFDTIAR<br/>                     KLENMOWTIHQVEMDLK<br/>                     LADAINVDDTDSSTGNR<br/>                     LADAINVDDTDSSTGNRNSSAR<br/>                     LENMOWTIHQVEMDLK<br/>                     LPADVNLIDQLER<br/>                     LPLISDGGGEIHEEIEK<br/>                     LPLISDGGGEIHEEIEKWSILSR<br/>                     LREYQGVDPHFDTIAR<br/>                     LRLPLISDGGGEIHEEIEK<br/>                     LVVAEAAQK<br/>                     NSPOVYETLEHR<br/>                     NYLVEATEEASAAAYNK<br/>                     SDGGGEIHEEIEK<br/>                     SPOVYETLEHR<br/>                     SSANSVAGGISLSAVDTRVGGVGNR<br/>                     STSNVNYANSANSVAGGISLSAVDTRVGGVGNR<br/>                     SVAGGISLSAVDTRVGGVGNR<br/>                     SVYSDLQLAR<br/>                     VKFIIIEIER<br/>                     VKFIIIEIERDEAALR<br/>                     VLENVLLLETYPDSISALHNIR<br/>                     YLEAMAIYCEAVMVEEYQQAISVANHGGIR                 </p>                                                                                                                                                                                                                                                                                                                                                                                                                                                                                                                                                                                                                                                                                                                                                                                                                                                                                                                                                                                                                                                                                                                    |
|                            | At5g38880                | AUG5                | 53         | <p>                     ADAEMLR<br/>                     AHVQOFLATEDALNK<br/>                     AIDLWHIR<br/>                     ANMDAVAFWVWQPLAAR<br/>                     ASLNTLLSEIQR<br/>                     DKITVTESSSYAEDR<br/>                     DPSAIPSIQR<br/>                     EYASATVIPASEVVDISNSAK<br/>                     EYASATVIPASEVVDISNSAKDFIEK<br/>                     GLLDEWWEQPASTVVDVDTVGGVSAVAWQNHVK<br/>                     GPELLLQAIAYTLR<br/>                     GSEACVLEDLAK<br/>                     GSTGPEAVAYAEK<br/>                     HKQALLEAYDQCCDEATR<br/>                     IGTDFHFQGSNNOLLER<br/>                     IGTDFHFQGSNNOLLEROKAHVQOF<br/>                     IRNSFPAYEGNGICSLPELETAK<br/>                     ISAAALQYPAGLEGSASLASVLESLEFCLR<br/>                     IVCDLLASR<br/>                     KIEFFDAR<br/>                     LGFEYDGEITDEMCK<br/>                     LGFEYDGEITDEMKTIVVNSLR<br/>                     LHGSADTATHSFVGGTQSGSNLR<br/>                     LOVYVNOANDAQR<br/>                     MLEVSRREEAER<br/>                     MQSLSSSAPTPEALILEWLQK<br/>                     NAALLTAR<br/>                     NITVHGGSSNASIGSSVNPQK<br/>                     NITVHGGSSNASIGSSVNPQKKEESK<br/>                     NSFPAYEGNGICSLPELETAK<br/>                     QALLEAYDQCCDEATR<br/>                     QDLVESGHSLLDHAFR<br/>                     QDLVESGHSLLDHAFFRAQQKYER<br/>                     QFELDVWQK<br/>                     QKAHVQOFLATEDALNK<br/>                     QLGPYNGSSK<br/>                     QLLAFYDKESLR<br/>                     QLLAFYDKESLRT<br/>                     RLQVYVNOANDAQR<br/>                     RSELETIYTTLLK<br/>                     SADDVILMETTR<br/>                     SELETIYTTLLK<br/>                     SHVPSIDAIRK<br/>                     SVNSSNEVLSSL<br/>                     SVNSSNEVLSSLANSER<br/>                     TAVONAQASSEHCK<br/>                     TIYTTLLKANMDAVAFWVWQPLAAR<br/>                     TTNVCLDLASEQENTISDQWLPRLR<br/>                     TVTGESSSYAEDR<br/>                     TVTGESSSYAEDREAALQER<br/>                     VRGSEACVLEDLAK<br/>                     VTDNSSDVSPLSYQFNGNGK<br/>                     WQNHVKQLLAFYDKESLRT                 </p> |
|                            | At5g40740                | AUG6                | 21         | <p>                     ALTSLEPSFLEPNVDFSAFQK<br/>                     ANDGDGPDILR<br/>                     DFDKVVPIFDSAQSR<br/>                     DSQSDGEGSEHYFVPLSATGFQR<br/>                     EAALLIPSSAGSSR<br/>                     EHYFVPLSATGFQR<br/>                     GLCAEEAYLQEQLEK<br/>                     IMEGVSNDAELTSTMSNVQLEK<br/>                     INQTVDAVEIQR<br/>                     ISGSALLAAMDQSSQVPR                 </p>                                                                                                                                                                                                                                                                                                                                                                                                                                                                                                                                                                                                                                                                                                                                                                                                                                                                                                                                                                                                                                                                                                                                                                                                                                                                                                                                                                                                                                                                                                                                                                                                                                                                                                                                                                                                                                                                                                   |

| Sample#                    | Gene ID                  | Gene Name           | # peptides | Peptide sequence                                                                                                                                                                                                                                                                                                                                                                                                                                                                                                                                                                                                                                                                                                                                                                                                                                                                                                                                                                                                                                                                                                                                                                                                                                                                                                                                                                                                                        |
|----------------------------|--------------------------|---------------------|------------|-----------------------------------------------------------------------------------------------------------------------------------------------------------------------------------------------------------------------------------------------------------------------------------------------------------------------------------------------------------------------------------------------------------------------------------------------------------------------------------------------------------------------------------------------------------------------------------------------------------------------------------------------------------------------------------------------------------------------------------------------------------------------------------------------------------------------------------------------------------------------------------------------------------------------------------------------------------------------------------------------------------------------------------------------------------------------------------------------------------------------------------------------------------------------------------------------------------------------------------------------------------------------------------------------------------------------------------------------------------------------------------------------------------------------------------------|
| AUG4-myc IP<br>(continued) | At5g40740<br>(continued) | AUG6<br>(continued) | 21         | <p>                     ISGSALLAAMDQSSQVPRAEILLSAHS<br/>                     LPQLFSSPTSSGK<br/>                     LWDSIMAR<br/>                     NSTDQALSINRPNLPTDSSSFVHNLK<br/>                     QEGEVWDDLVSSSSQNSHLVSK<br/>                     QTMASOVNKMESLSEK<br/>                     SNGOASSLLOSGQSGR<br/>                     TFPADVASNPLPSSLTDVFSHAATLLPVTK<br/>                     VKQEGEVWDDLVSSSSQNSHLVSK<br/>                     VSSLATCCGPR                 </p>                                                                                                                                                                                                                                                                                                                                                                                                                                                                                                                                                                                                                                                                                                                                                                                                                                                                                                                                                |
|                            | At5g17620                | AUG7                | 12         | <p>                     AFNTIYTK<br/>                     ANAPAQSLLFAGMER<br/>                     ARLESFLETAR<br/>                     DIQLIDAIER<br/>                     DLGLSASIAR<br/>                     FLGITPTVDIEAIOGHGTIEDR<br/>                     IQYLAEIAK<br/>                     IVSDCEAALTVLNR<br/>                     LLEAYNMLLK<br/>                     NIVDLVEASLFDSDNQEWSIDEQVAK<br/>                     QSLIFSECK<br/>                     SPFSQOQLQGDAGVREDETVR                 </p>                                                                                                                                                                                                                                                                                                                                                                                                                                                                                                                                                                                                                                                                                                                                                                                                                                                                                                                        |
|                            | At4g30710                | AUG8                | 8          | <p>                     AESVMYIQR<br/>                     ASYIEDVHQLR<br/>                     ATLATAVAR<br/>                     CEDLLASTAIMQIEECSLR<br/>                     DHVSSLVGAISDLEANTLR<br/>                     KASYIEDVHQLR<br/>                     REEGEDAETPPPLPLSK<br/>                     TSFLSSSSISR                 </p>                                                                                                                                                                                                                                                                                                                                                                                                                                                                                                                                                                                                                                                                                                                                                                                                                                                                                                                                                                                                                                                                                          |
| AUG5-myc IP                | At2g41350                | AUG1                | 22         | <p>                     ALAALAIEDK<br/>                     ALAALAIEDKK<br/>                     AWLTSQFEAVGK<br/>                     DTESSFLVAMGDILSR<br/>                     DTESSFLVAMGDILSRK<br/>                     ELVEMAEHR<br/>                     ELVEMAEHRK<br/>                     ESNALLDYTR<br/>                     ESNALLDYTRK<br/>                     EVPNFEYTHR<br/>                     ILAQLEDDVVPCEQSMENWK<br/>                     KYEMLLNR<br/>                     MTKVPLDILR<br/>                     SDVTGDLAAVSEAK<br/>                     SITHLYNLATASQAK<br/>                     SOAATVANDFR<br/>                     SYQDLPPDK<br/>                     SYQDLPPDKALAAIAEDK<br/>                     TNLVEMAVK<br/>                     TNLVEMAVKEEQYIQQYK<br/>                     YEMLLNR<br/>                     YLEEVLSALETNDE                 </p>                                                                                                                                                                                                                                                                                                                                                                                                                                                                                                                                            |
|                            | At2g32980                | AUG2                | 6          | <p>                     ESFATLQELR<br/>                     FFEAMSAMR<br/>                     IADLOVELQGR<br/>                     IESSFDLAVHK<br/>                     KIADLOVELQGR<br/>                     LQPPYSLDCIPVEAEYQK                 </p>                                                                                                                                                                                                                                                                                                                                                                                                                                                                                                                                                                                                                                                                                                                                                                                                                                                                                                                                                                                                                                                                                                                                                                                  |
|                            | At5g48520                | AUG3                | 33         | <p>                     CSALIQAAASDVQEGAVDDR<br/>                     CSALIQAAASDVQEGAVDDRSLHGV<br/>                     CSWVSLDSTSNMLR<br/>                     DATLAHKALELQOR<br/>                     DGKLEGGDLDOAYDSISAFSSR<br/>                     DSFLHGV<br/>                     GKLEGGDLDOAYDSISAFSSR<br/>                     HADLVEEISTLYQK<br/>                     HADLVEEISTLYQKEEK<br/>                     KHADLVEEISTLYQK<br/>                     KHADLVEEISTLYQKEEK<br/>                     KNMLGAFSLK<br/>                     LCSLVAELGYEGAGK<br/>                     LLEGDDLDOAYDSISAFSSR<br/>                     LLESETIPELQWELAQLDYILOGDYDLK<br/>                     LOTQYDILLTQSSALIQGR<br/>                     LSTAVEEVTLEHR<br/>                     NLQMNGLVGR<br/>                     NMLGAFSLK<br/>                     NNOEAVFGAEESEK<br/>                     NNOEAVFGAEESEKVEYR<br/>                     QOAILTLK<br/>                     OWIEAQVENAK<br/>                     RLQTYDILLTQSSALIQGR<br/>                     RNNQOAVFGAEESEK<br/>                     RYVDFFCNPER<br/>                     SQVTSVEAIIHFDLHSLR<br/>                     VAATSVAHQITAIEDLSAR<br/>                     VFHNHVNQLAR<br/>                     VVDFFCNPER<br/>                     VIESELQGYLSATR<br/>                     VMRQELYISK<br/>                     WELAQLDYILOGDYDLK                 </p> |

Supplemental Data. Hotta et al. Plant Cell. (2012). 10.1105/tpc.112.096610

| Sample#                    | Gene ID   | Gene Name | # peptides | Peptide sequence                                                                                                                                                                                                                                                                                                                                                                                                                                                                                                                                                                                                                                                                                                                      |
|----------------------------|-----------|-----------|------------|---------------------------------------------------------------------------------------------------------------------------------------------------------------------------------------------------------------------------------------------------------------------------------------------------------------------------------------------------------------------------------------------------------------------------------------------------------------------------------------------------------------------------------------------------------------------------------------------------------------------------------------------------------------------------------------------------------------------------------------|
| AUG5-myc IP<br>(continued) | A11g50710 | AUG4      | 24         | ALOGAAONLPADVNQLIDOLER<br>CDKLADAIIVDDTDSSTGNR<br>DEAALREDLYSADRK<br>DVQGLYPQLGLK<br>EYQGVDPHFDIAR<br>FIIIEIERDEAALR<br>FIIIEIERDEAALREDLYSADR<br>HCLAPDQSLVTK<br>KAVTRLREYQGVDPHFDIAR<br>KLENMOWTHIQVEMDLK<br>LADAIIVDDTDSSTGNR<br>LENMOWTHIQVEMDLK<br>LPLISDGGGEIHEEIEK<br>LPLISDGGGEIHEEIEKWSILSR<br>LREYQGVDPHFDIAR<br>LRLPLISDGGGEIHEEIEK<br>LVVAEAAQK<br>NSPOVYETLEHR<br>NYLVEATEEASAAYNK<br>SVAGISLSAVDTDVVGGVPNR<br>SVYSDQLLAR<br>VKFIIIEIER<br>VLENVLLLETYPDISALHNIR<br>YLEAMAIYCEAVAMVEEYQQAISVANHGGIR                                                                                                                                                                                                                      |
|                            | A15g38880 | AUG5      | 56         | AGARDPSAIPICR<br>AHVQQFLATEDALNK<br>AIDLWHIR<br>ANMDAVAFWNQOPLAAR<br>ASEQENTISDQWLPELR<br>ASLNTLLSEIQR<br>DKTVTGESSSYAEDR<br>DPSAIPICR<br>EAVYSTVK<br>EYASATVIPASEVVDISNSAK<br>EYASATVIPASEVVDISNSAKDFIEK<br>GILLDEWEPASTVVDVTVDQGSVAAWQNHVK<br>GNMIPWNFLNR<br>GPELLLQAIAYTLR<br>GSEACVLEDLAK<br>GSEACVLEDLAKAIDLH<br>HKQALLEAYDQCDEATR<br>IGTDTHFQGSNNQLLER<br>IPASEVVDISNSAK<br>IRNSFPAYEGNGICSLPELETAK<br>ISAALQYPAGLEGSDASLASVLESLEFCLR<br>IVCDLLASR<br>LGFYDGEITDEMK<br>LGFYDGEITDEMKTVIVNSLR<br>LHGSADTATHSFVGGTQSGSNLR<br>LQVYVNOANDAQR<br>MQSLSSSAPTPEAILEWLQK<br>NAALLTAR<br>NITVHGGSSNASIGSSVNPVK<br>NITVHGGSSNASIGSSVNPVKKEESK<br>NSFPAYEGNGICSLPELETAK<br>QALLEAYDQCDEATR<br>QDLVESGHSLLDHAFR<br>QDLVESGHSLLDHAFFRAQQKYER |

| Sample#                    | Gene ID   | Gene Name           | # peptides | Peptide sequence                                                                                                                                                                                                                                                                                                                                                                                                                       |
|----------------------------|-----------|---------------------|------------|----------------------------------------------------------------------------------------------------------------------------------------------------------------------------------------------------------------------------------------------------------------------------------------------------------------------------------------------------------------------------------------------------------------------------------------|
| AUG5-myc IP<br>(continued) | A15g38880 | AUG5<br>(continued) | 56         | OFELDWWGK<br>OFELDWWGKER<br>OKAHVQQFLATEDALNK<br>QLGPNYGGSSK<br>QLLAFYDKESLR<br>RLOVYVNOANDAQR<br>RSELETITVTLK<br>SADDVILMETTR<br>SELETITVTLK<br>SFVGGTQSGSNLR<br>SHVPSIDAIR<br>SHVPSIDAIRK<br>SVNNSNEVLSL<br>SVNNSNEVLSLSANSEK<br>TAVONACASSECHK<br>TIYITLLKANMDAVAFWNQOPLAAR<br>TTNYCLDLASEQENTISDQWLPELR<br>TVTGESSSYAEDR<br>TVTGESSSYAEDREAALQER<br>VESGHSLLDHAFR<br>VRGSEACVLEDLAK<br>VTDNSSSDVSSPLSYQFNGNGK                      |
|                            | A15g40740 | AUG6                | 20         | ALTLSLSEPSLEPNVDPFAPSK<br>ANDGGDPILR<br>DFDKVWPIFSAQSR<br>DSQSDGEGSEHYFVPLSATGFSR<br>EAALLIPSSAGSSR<br>EHYFVPLSATGFSR<br>GLCAEEAYLQGELEK<br>GLCAEEAYLQGELEKLNDR<br>INQTVDAEVIR<br>ISGSALLAAMDQSSQVPR<br>ISGSALLAAMDQSSQVFPRAELLSAHSK<br>KQOHEVLASGPIEDLHAHR<br>LPOLFSSTPTSSGK<br>LWDSIMAR<br>OEGEVWDDLVSQSSQNSHLVSK<br>QTMASQVNMESLSEK<br>SNGQASSLQSQGSGR<br>TFPADVASNPLPSSLTDVFSHAATLLPVTK<br>VKOEGEVWDDLVSQSSQNSHLVSK<br>VSSLATCCGPR |
| AUG5-myc IP<br>(continued) | A15g17620 | AUG7                | 13         | ANAPAQSLFAGMER<br>DIQLIDAIER<br>DLGILSASIAER<br>DSHAALSIGSSGTVAGEPSSVTR<br>FLGITPTVDIAIQGHGTIEDR<br>HAYNPDEEYTEVESQLR<br>IQYLAEIAK<br>IVSDCEAALTVLNR<br>LFPADVQIQSIYPLPDVSELETK<br>LLEAYNMLLK<br>NIVDLVEASLFSNDEWSIDEQVAK<br>QSLIFSECK<br>SPFSQNLQGDAGVREDETVR                                                                                                                                                                         |
|                            | A14g30710 | AUG8                | 2          | ASYIEDVHQLR<br>ATLATAVAR                                                                                                                                                                                                                                                                                                                                                                                                               |

Supplemental Table 4. List of primers used in this work.

| Name         | Sequence                                       |
|--------------|------------------------------------------------|
| 2g2LP        | 5'-GGTGAAGGAGGAACAATACATACAG-3'                |
| 2g1RP3       | 5'-GTCCTGTTTACAGAAATGAACAACCAATC-3'            |
| TH071        | 5'-TTCTATTACATTGGTTGGTTTTTGTG-3'               |
| TH072        | 5'-CCAATAAGTTATCATAAGGCTTCAGG-3'               |
| 1g2LP        | 5'-CATTGTTGATGACACTGGTAAGATC-3'                |
| 1g2RP        | 5'-AATACATGGAAAGAAACATGTCTGG-3'                |
| 5g2LP        | 5'-ATCATCTGCAGACTTAGTTCCTTTG -3'               |
| 5g2RP        | 5'-AGCAAATCTCATGTTCCCTTCTATTG-3'               |
| sk18263-LP   | 5'-TAAAATGTCCCATCTATTTGAAAAG-3'                |
| sk18263-RP   | 5'-GCCAGAGAAGAAACAATAAGTAAACC-3'               |
| LBa1         | 5'-TGGTTCACGTAGTGGGCCATCG-3'                   |
| LBb1.3       | 5'-ATTTTGCCGATTTCCGGAAC-3'                     |
| GLB3         | 5'-TAGCATCTGAATTTTATAACCAATCTCGATACAC-3'       |
| SK-L1        | 5'-TTCTCATCTAAGCCCCATTTGG-3'                   |
| 50710-F      | 5'-CACCTATGTGATTAGTTAGTTTTTATATGTTAAAC-3'      |
| 50710-R      | 5'-TGCGCCTGCGCCGTCATGAGACTTAAGGTCCATTTCTAC-3'  |
| 38880-F      | 5'-CACCATCAAACAAAACCCTAGGAAGGAACCTC-3'         |
| 38880-R      | 5'-TGCGCCTGCGCCGTTTCGCAATGATTCTTTATCATAGAAG-3' |
| 40740-F      | 5'-CACCCTTTTTGACAAAATCATGGTAGCCACTGC-3'        |
| 40740-R      | 5'-TGCGCCTGCGCCATGCTCCATTAAAGCGGCTTCGGTTTC-3'  |
| 17620-F      | 5'-CACCGTTCCTGGACTTTGCTCCTTCTCGAATATAG-3'      |
| 17620-R      | 5'-TGCGCCTGCGCCAAGACGCTCACCTTGCTCACGAGC-3'     |
| Q-17620_F    | 5'-GGTGATAAATCACCTTTCTCACAGC-3'                |
| Q-17620_R    | 5'-GGCTCGCCTCCACTAAATCAAC-3'                   |
| TH121        | 5'-GGAATTCTAATGAGCAGCGGAGACTGTGCTCTCTTG-3'     |
| TH122        | 5'-CCCAGCTCCAAAAGAATAGCTTGTTGCTTAGCATTCC-3'    |
| U50487_Bam5' | 5'-ATATGGATCCATGGTGAAGGCACTGCAAGG-3'           |
| U50487_Xho3' | 5'-ATCGCTCGAGATCAGTCATGAGACTTAAGGTCC-3'        |
| Xba23033F    | 5'-GCGGTCTAGAGATGCTTGATGAAAGAGC-3'             |
| Hind23033R   | 5'-GCCGAAGCTTCTTTCTTTCCCTTCCCA-3'              |
